## **Distributions and risks of SARS-CoV-2 in hospital outdoor environment**

Dayi Zhang<sup>1,\*</sup>, Yunfeng Yang<sup>1</sup>, Xia Huang<sup>1</sup>, Jingkun Jiang<sup>1</sup>, Miao Li<sup>1</sup>, Xian Zhang<sup>1</sup>, Haibo Ling<sup>2</sup>, Jing Li<sup>3</sup>, Yi Liu<sup>1</sup>, Guanghe Li<sup>1</sup>, Weiwei Li<sup>2</sup>, Chuan Yi<sup>2</sup>, Ting Zhang<sup>3</sup>, Yongzhong Jiang<sup>3</sup>, Songqiang Deng<sup>4</sup>, Peng Zhao<sup>4</sup>, Jiuhui Qu<sup>1,5,\*</sup>

1. School of Environment, Tsinghua University, Beijing 100084, P.R. China
2. Hubei Academy of Environmental Sciences, Wuhan 430072, P.R. China
3. Hubei Center for Disease Control and Prevention, Wuhan 430079, P.R. China
4. Research Institute for Environmental Innovation (Tsinghua-Suzhou), Suzhou 215163, P.R. China
5. Key Laboratory of Drinking Water Science and Technology, Research Center for Eco-Environmental Sciences, Chinese Academy of Sciences, Beijing 100085, P.R. China

### **Corresponding author**

Dr Dayi Zhang

School of Environment, Tsinghua University, Beijing 100084, P.R. China

Email: [zhangdayi@tsinghua.edu.cn](mailto:zhangdayi@tsinghua.edu.cn)

Tel: +86(0)10-62773232; Fax: +86(0)10-62795687

Prof Jiuhui Qu

School of Environment, Tsinghua University, Beijing 100084, P.R. China

Email: [jhqu@tsinghua.edu.cn](mailto:jhqu@tsinghua.edu.cn)

Tel: +86(0)10-62849151; Fax: +86(0)10-62795687

## Abstract

The outbreak of coronavirus infectious disease-2019 (COVID-19) pneumonia since 2019 has rapidly spread throughout over 200 countries around the world. Till 14<sup>th</sup> May 2020, there are over 4 million confirmed cases and 300,000 deaths globally <sup>1</sup>. To date, numerous studies focus on the presence of severe acute respiratory syndrome coronavirus 2 (SARS-CoV-2) in indoor areas for its main transmission routes *via* human respiratory droplets and direct contact <sup>2,3</sup>. It remains unclear about the distribution and transmission risks of SARS-CoV-2 in outdoor environment despite its threats to healthy people and communities. Here, we investigated the presence of SARS-CoV-2 virus in 73 specimens from outdoor environment of three hospitals in Wuhan. We found SARS-CoV-2 in soils (205-550 copies/g), wastewaters (255 to  $1.9 \times 10^4$  copies/L) and aerosols (285-1130 copies/m<sup>3</sup>) in locations close to departments receiving COVID-19 patients or in wastewater treatment sectors, which revealed significant viral spill-over in hospital outdoor environment that was possibly *via* respiratory droplets from patients or airborne aerosols from wastewater containing SARS-CoV-2. In contrast, SARS-CoV-2 was not detected in other areas or on surfaces with regular disinfection. Soils eventually behave as viral receptors through deposition and potentially a secondary source spreading SARS-CoV-2 for a prolonged time. Our findings map the high-risk areas in hospital outdoor environment possessing spread risks of SARS-CoV-2, which require particular attention and complete sanitation for preventing SARS-CoV-2 outdoor transmission.

It is clear that SARS-CoV-2 causing COVID-19<sup>4-6</sup> is transmitted among people<sup>5,7-9</sup> *via* direct contact and respiratory droplet routes<sup>6,10,11</sup>, while aerosol or faecal transmission route is arguable<sup>12-14</sup>. Accordingly, many studies have addressed SARS-CoV-2 in hospital indoor environment to understand its transmission dynamics and find solutions protecting medical staffs or drop-in visitors<sup>3,15</sup>. For healthy people and communities, there is still no knowledge about its presence in outdoor environment. It is of great urgency to evaluate the potential spill-over into open space and distribution in outdoor environmental matrices of SARS-CoV-2, that potentially survives for a prolonged time and threatens public health.

We collected seventy-three outdoor environmental specimens of water (28), aerosol (16), soil (15) and surface (14) from 13 sites in three specialized hospitals dedicated for COVID-19 treatments, i.e., Jinyintan Hospital, Huoshenshan Hospital and Wuchang Fangcang Hospital, during their operation receiving COVID-19 patients in March and April (Figure 1 and Table S1, see Methods for details). Three out of 15 soil samples (20%) exhibited positive results for SARS-CoV-2 viral RNA, and they are located in wastewater treatment sector and outside patient departments (Table 1). Of two soils collected in wastewater treatment sector of Jinyintan Hospital, the one with 2 m distance to the adjusting tank had 253 copies/g of SARS-CoV-2 (Table S1), whereas the other one 2 m away from the disinfection tank was negative. There was 205 copies/g of SARS-CoV-2 in soils with 5 m distance to the outpatient department but non-detected in those 20 m away from inpatient department. In Huoshenshan Hospital, only soil with 2 m distance to the first adjusting tank had SARS-CoV-2 viral DNA detected (550 copies/g), and soils

collected from other wastewater treatment sectors or medical staff living area exhibited negative results. None of soils in Wuchang Fang Hospital surrounding septic tanks and in background areas showed the viral presence. All surfaces in outdoor environment of the three studied hospitals were frequently disinfected and exhibited negative results. This is the first report showing the presence of SARS-CoV-2 viral RNA in soils. As soils are environmental matrices rich in organic matters protecting and shielding viruses, SARS-CoV-2 might escape from disinfectants and other stresses like ultraviolet light as evidenced by previous studies on other viruses<sup>16,17</sup>, and possibly survive for a prolonged time in hospital outdoor environment.

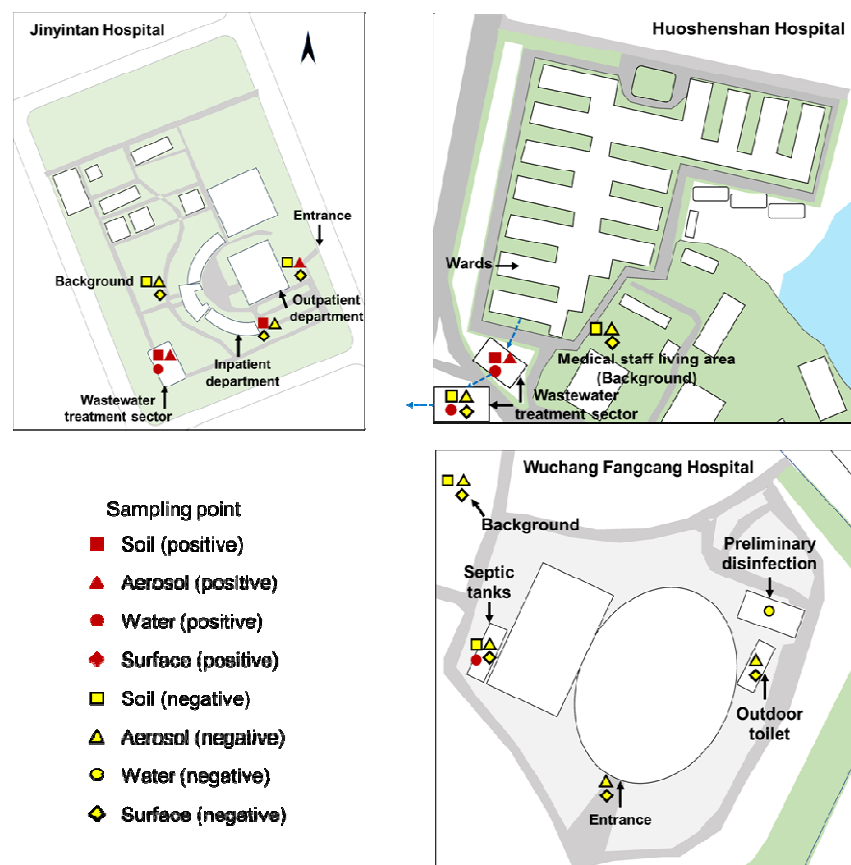

**Figure 1.** Outdoor environment sampling sites in Jinyintan, Huoshenshan and Wuchang Fangcang Hospitals.

**Table 1.** Distributions of SARS-CoV-2 RNA in hospital outdoor environment.

| Hospital         | Site                                   | Sample type |             |              |          |
|------------------|----------------------------------------|-------------|-------------|--------------|----------|
|                  |                                        | Soil        | Aerosol     | Water        | Surface  |
| Jinyintan        | Wastewater treatment sector            | 50% (1/2)   | 100% (1/1)  | 20% (1/5)    | -        |
|                  | Out- and In-patient department         | 50% (1/2)   | 50% (1/2)   | -            | 0% (0/2) |
|                  | Background                             | 0% (0/1)    | 0% (0/1)    | -            | 0% (0/1) |
| Huoshenshan      | Wastewater treatment sector            | 50% (1/2)   | 33.3% (1/3) | 30% (3/10)   | 0% (0/2) |
|                  | Background (Medical staff living area) | 0% (0/2)    | 0% (0/2)    | -            | 0% (0/2) |
| Wuchang Fangcang | Wastewater treatment sector            | 0% (0/4)    | 0% (0/2)    | 53.8% (7/13) | -        |
|                  | Entrance                               | -           | 0% (0/2)    | -            | 0% (0/2) |
|                  | Outdoor toilet                         | -           | 0% (0/1)    | -            | 0% (0/2) |
|                  | Background                             | 0% (0/2)    | 0% (0/2)    | -            | 0% (0/2) |

To trace the source of SARS-CoV-2 in soils, we investigated the surrounding aerosols. Inside the adjusting tank of Jinyintan Hospital and Huoshenshan Hospital where viruses were found in soils, the aerosols contained 285 copies/m<sup>3</sup> and 603 copies/m<sup>3</sup> of SARS-CoV-2, respectively (Table 1 and Table S1). They were of similar levels as those detected in intensive care units (ICU)<sup>3,18</sup> and exhibited high transmission potential *via* aerosol deposition. On the contrary, those from downstream wastewater treatment sectors of second adjusting tank and MBBR exhibited negative results. Outside patient departments of Jinyintan Hospital, the aerosols collected 5 m away from outpatient building were positive (1130 copies/m<sup>3</sup>), whereas those collected 5 m away from inpatient building were negative. As aerosol is dynamic, SARS-CoV-2 in aerosol depends on the occurrence of respiratory droplets or airborne viruses in short period, and the visits of COVID-19 confirmed or asymptomatic patients might contribute to the presence of SARS-CoV-2 in these areas<sup>2</sup>. Around all soils exhibiting negative

results, e.g., background area of Jinyintan Hospital, medical staff living area of Huoshenshan Hospital, and the entrance and outdoor toilet of Wuchang Fangcang Hospital, no SARS-CoV-2 was detected in aerosols. Our results suggested that hospitals receiving COVID-19 patients have high-risk outdoor areas (patient departments and wastewater treatment sector). The co-existence of SARS-CoV-2 in both soils and aerosols at these sites hints that viruses in soils might accumulate from the deposition of airborne SARS-CoV-2. As the transport of aerosols has limited distance<sup>19</sup>, the high-risk areas cover only a small proportion of hospital outdoor environment.

To further explain where the aerosol and soil SARS-CoV-2 came from in wastewater treatment sector, we detected SARS-CoV-2 viral RNA in waters from different treatment tanks. In Jinyintan Hospital, SARS-CoV-2 was only detected in water from the adjusting tank (255 copies/L, Table S1), while negative results were obtained from other tanks and effluents. Crude medical wastewater in the adjusting tank of Huoshenshan Hospital contained 633 copies/L of SARS-CoV-2, which was only occasionally found in the moving-bed biofilm reactor (MBBR, 505 copies/L) and sedimentation tank ( $2.2 \times 10^3$  copies/L) (Table S1). No SARS-CoV-2 was detected in effluents after disinfection. All water samples collected in the preliminary disinfection tanks of Wuchang Fangcang Hospital had negative RT-qPCR results. Before 5<sup>th</sup> March, SARS-CoV-2 RNA was detected in wastewater from the septic tanks disinfected by 800 mg/L of sodium hypochlorite, ranging from 557 to  $1.9 \times 10^4$  copies/L, and it declined to non-detected after the dosage of sodium hypochlorite increased to 6,700 mg/L since 5<sup>th</sup> March<sup>20</sup>. Our results suggested apparent presence of SARS-CoV-2 viral RNA in crude water from wards,

signifying the need for complete disinfection. As it decayed rapidly in medical wastewater treatment process and a complete disinfection was applied for all effluents before discharge, there was neglectable risk of SARS-CoV-2 spreading through pipe network receiving treated wastewater from hospitals.

It is worth noting that SARS-CoV-2 was observed in all waters, aerosols and surrounding soils at the adjusting tank of wastewater treatment sector in Jinyintan Hospital and Huoshenshan Hospital (Table 1). As these areas are not visited by COVID-19 patients and medical staffs, SARS-CoV-2 hypothetically comes from viral RNA-containing medical wastewater *via* the aerosolization in the uplifting process, forms airborne SARS-CoV-2 in aerosols, and eventually deposits on soils. The wastewater treatment sector in Wuchang Fangcang Hospital is a temporary closed system effectively preventing the spill-over of airborne SARS-CoV-2 from wastewater, and negative results were therefore obtained in surrounding aerosols and soils. As for other surfaces of road and wall in wastewater treatment sector, frequent disinfection of three times a day could effectively remove all viral RNA and resulted in non-detected SARS-CoV-2 (Table 1).

From our results in the three specialized hospitals dedicated for COVID-19 treatments, we for the first time proved the presence of SARS-CoV-2 viral RNA in hospital outdoor environment. SARS-CoV-2 existed in all environmental matrices at hospital departments receiving confirmed or suspected COVID-19 patients (aerosols and soils) and wastewater treatment sector (wastewaters, aerosols and soils). These are high-risk areas for potential SARS-CoV-2 transmission in open environment. We therefore propose a schematic transport of SARS-CoV-2 in hospital outdoor environment (Figure 2). High-risk

areas located outside patient departments are exposed to respiratory droplets containing SARS-CoV-2 by receiving confirmed or asymptomatic COVID-19 patients. Alternatively, undisinfected medical wastewater in the adjusting tank of wastewater treatment sector might spread airborne viruses through uplifting or aeration and deposit SARS-CoV-2 on surrounding soils and solid-surfaces. Similar results have been observed for Middle East Respiratory Syndrome (MERS) Coronavirus in air, medical devices and other swabbing environmental surfaces<sup>21,22</sup> and Norovirus in hospital indoor environment<sup>23</sup>. Traditional disinfection strategies focus on surfaces of walls, roads and facilities, and can deactivate with high efficiency, supported by negative RT-qPCR results of all surface samples in this work and data from other reports<sup>24,25</sup>. Viral presence and survival in soils are seldom discussed and there is limited work addressing the potential risks of soil viruses<sup>26</sup>. Soils are receptors of viruses from aerosols and waters, and potentially become a secondary source for SARS-CoV-2 transmission in outdoor environment.



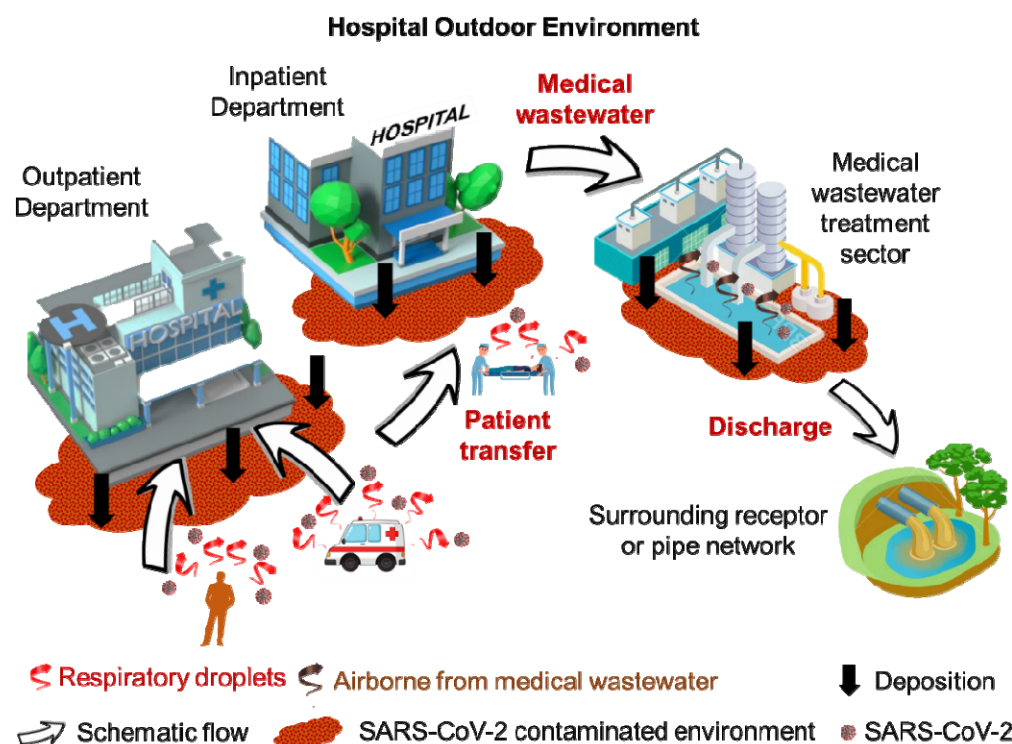

**Figure 2.** Distribution and potential transport of SARS-CoV-2 in high-risk areas of hospital outdoor environment.

Although we did not demonstrate SARS-CoV-2 infectivity by viral culture and only collected limited numbers of samples owing to the strict control during the COVID-19 outbreak in Wuhan, our study unravels the distributions of SARS-CoV-2 in soils, aerosols, waters and surfaces, covering the major outdoor environments of hospitals. Although viruses might decay rapidly from these high-risk areas and regular disinfection can effectively eliminate SARS-CoV-2, the overall risks of hospital outdoor environment are significant, particularly in those high-risk areas.

## Materials and methods

### *Hospitals*

Jinyintan Hospital is the first hospital receiving COVID-19 patients, and in outpatient and inpatient departments. Its medical wastewater treatment sector adopts an adjusting tank, an aeration tank for biodegradation, a secondary sedimentation tank and a disinfection tank (Figure S1A). Huoshenshan hospital is COVID-19 designated hospital and confirmed patents were transferred directly into wards. There is no inpatient or outpatient department, and the wastewater treatment sector consists of a process integrated storage sector with two adjusting tanks and one septic tank, a moving-bed biofilm reactor (MBBR), a sedimentation tank and a disinfection tank (Figure S1B). Medical staff area is located south-east to ward area. Wuchang Fangcang Hospital is a temporary shielding hospital open from 5<sup>th</sup> February to 10<sup>th</sup> March 2020, receiving 1124 COVID-19 patients. Wastewater from eight outdoor toilets were pumped in 4 preliminary disinfection tanks, transferred into three septic tanks outside, followed a final disinfection. After 24-hour, the effluent was pumped and discharged into pipe network and wastewater treatment plants. Chlorine-based disinfectants are supplemented in wards and the disinfection tank only.

### *Sample collection*

Sampling sites are located in outdoor environment of Jinyintan, Huoshenshan and Wuchang Fangcang Hospitals, including different in wastewater treatment sectors, inpatient departments, outpatient departments, outdoor toilets and temperate septic tanks (Figure 1 and Table S1). Around 2.0 L of water was directly collected in a plexiglass sampler. Aerosol samples were collected

using bioaerosol samplers (WA-15, Beijing Dinglan Tech. Ltd., China) at a flow rate of 14.0 L/min for 30 min. About 20 grams of soils were sampled at the ground surface (< 5 cm), and surface samples were collected using swabs wetted with phosphate buffer saline (pH=7.4) from road or wall (20×20 cm). All samples were immediately placed in 4 °C ice-boxes and transferred into laboratory for RNA extraction on the same day.

### *RNA extraction and RT-qPCR*

RNA extraction from all environmental specimens followed our reported protocol <sup>20</sup>. Briefly, water (400 mL) and aerosol (2-3 mL) samples were centrifuged at 3,000 rpm, and the supernatant was subsequently supplemented with NaCl (0.3 mol/L) and PEG-6000 (10%), settled overnight at 4 °C, and centrifuged at 10,000 g for 30 minutes. Soil (3-5 g) and viral pellets after PEG-6000 sedimentation was extracted using the RNeasy® PowerSoil® Total RNA Kit (MOBIO, USA) according to the manufacturer's instructions. SARS-CoV-2 RNA was quantified by RT-qPCR using AgPath-ID™ One-Step RT-PCR Kit (Life Technologies, USA) on a LightCycler 480 Real-time PCR platform (Roche, USA) in duplicates. Two target genes simultaneously amplified were open reading frame lab (CCDC-ORF1, forwards primer: 5'-CCCTGTGGGTTTTACTTAA-3'; reverse primer: 5'-ACGATTGTGCATCAGCTGA-3'; fluorescence probe: 5'-FAM-CCGTCTGCGGTATGTGGAAAGGTTATGG-BHQ1-3') and nucleocapsid protein (CCDC-N, forwards primer: 5'-GGGGAAGTTCTCCTGCTAGAAT-3'; reverse primer: 5'-CAGACATTTTGCTCTCAAGCTG-3'; fluorescence probe: 5'-FAM-TTGCTGCTGCTTGACAGATT-TAMRA-3'). RT-qPCR amplification for

CCDC-ORF1 and CCDC-N was performed in 25  $\mu$ L reaction mixtures containing 12.5  $\mu$ L of 2 $\times$ RT-PCR Buffer, 1  $\mu$ L of 25 $\times$ RT-PCR Enzyme Mix, 4  $\mu$ L mixtures of forward primer (400 nM), reverse primer (400 nM) and probe (120 nM), and 5  $\mu$ L of template RNA. Reverse transcription was conducted at 45 $^{\circ}$ C for 10 min (1 cycle), followed by initial denaturation at 90 $^{\circ}$ C for 10 min (1 cycle) and 40 thermal cycles of 60 $^{\circ}$ C for 45 second and 90 $^{\circ}$ C for 15 seconds. Quantitative fluorescent signal for each sample was normalized by ROX<sup>TM</sup> passive reference dye provided in 2 $\times$ RT-PCR buffer. For each RT-qPCR run, both positive and negative controls were included. The copy numbers of SARS-CoV-2 was obtained from a standard calibration curve by a 10-fold serial dilution of genes encoding nucleocapsid protein with an amplification efficiency of 102.6%, calculated as  $\text{copies} = 10^{[-(Cq - 39.086)/3.262]}$  ( $R^2 = 0.991$ ). For quality control, a reagent blank and extraction blank were included for RNA extraction procedure and no contamination was observed.

## Author Contribution

Concept and design: DZ, GL, YL, JQ.

Data acquisition: DZ, HL, JL, WL, CY, TZ, YJ, XZ.

Analysis or interpretation of data: YY, XH, JJ, ML, GL, SD, PZ.

Drafting of the manuscript: DZ, YY, JJ, SD, QJ.

## References

- 1 WHO. Coronavirus disease (COVID-19) Situation Report -111. 10 May, (2020).
- 2 Qian, H. *et al.* Indoor transmission of SARS-CoV-2. *medRxiv*, 2020.2004.2004.20053058, (2020).
- 3 Liu, Y. *et al.* Aerodynamic analysis of SARS-CoV-2 in two Wuhan hospitals. *Nature*, 10.1038/s41586-41020-42271-41583, (2020).
- 4 Ralph, R. *et al.* 2019-nCoV (Wuhan virus), a novel Coronavirus: human-to-human transmission, travel-related cases, and vaccine readiness. *Journal of Infection in Developing Countries* **14**, 3-17, (2020).
- 5 Li, Q. *et al.* Early Transmission Dynamics in Wuhan, China, of Novel Coronavirus–Infected Pneumonia. *New England Journal of Medicine* **382**, 1199-1207, (2020).
- 6 Lai, C.-C., Shih, T.-P., Ko, W.-C., Tang, H.-J. & Hsueh, P.-R. Severe acute respiratory syndrome coronavirus 2 (SARS-CoV-2) and coronavirus disease-2019 (COVID-19): The epidemic and the challenges. *Int. J. Antimicrob. Agents* **55**, 105924, (2020).
- 7 Chan, J. F. W. *et al.* A familial cluster of pneumonia associated with the 2019 novel coronavirus indicating person-to-person transmission: a study of a family cluster. *Lancet* **395**, 514-523, (2020).
- 8 Poon, L. L. M. & Peiris, M. Emergence of a novel human coronavirus threatening human health. *Nat Med*, 1-2, (2020).
- 9 Chang, D. *et al.* Epidemiologic and Clinical Characteristics of Novel Coronavirus Infections Involving 13 Patients Outside Wuhan, China. *JAMA* **323**, 1092-1093, (2020).
- 10 Carlos, W. G., Dela Cruz, C. S., Cao, B., Pasnick, S. & Jamil, S. Novel Wuhan (2019-nCoV) Coronavirus. *American Journal of Respiratory and Critical Care Medicine* **201**, P7-P8, (2020).
- 11 Wu, J. *et al.* Clinical Characteristics of Imported Cases of COVID-19 in Jiangsu Province: A Multicenter Descriptive Study. *Clinical Infectious Diseases*, ciaa199, (2020).
- 12 Holshue, M. L. *et al.* First Case of 2019 Novel Coronavirus in the United States. *New England Journal of Medicine* **382**, 929-936, (2020).
- 13 Tian, Y., Rong, L., Nian, W. & He, Y. Review article: Gastrointestinal features in COVID-19 and the possibility of faecal transmission. *Alimentary Pharmacology & Therapeutics*, doi: 10.1111/apt.15731, (2020).
- 14 Zhang, J., Wang, S. & Xue, Y. Fecal specimen diagnosis 2019 Novel Coronavirus–Infected pneumonia. *Journal of Medical Virology*, <https://doi.org/10.1002/jmv.25742>, (2020).
- 15 Chia, P. Y. *et al.* Detection of Air and Surface Contamination by Severe Acute Respiratory Syndrome Coronavirus 2 (SARS-CoV-2) in Hospital Rooms of Infected Patients. *medRxiv*, 2020.2003.2029.20046557,

- (2020).
- 16 Hurst, C. J., Gerba, C. P. & Cech, I. Effects of Environmental Variables and Soil Characteristics on Virus Survival in Soil. *Appl. Environ. Microbiol.* **40**, 1067-1079, (1980).
- 17 Vettori, C., Gallori, E. & Stotzky, G. Clay minerals protect bacteriophage PBS1 of *Bacillus subtilis* against inactivation and loss of transducing ability by UV radiation. *Canadian Journal of Microbiology* **46**, 770-773, (2000).
- 18 Guo, Z.-D. *et al.* Aerosol and Surface Distribution of Severe Acute Respiratory Syndrome Coronavirus 2 in Hospital Wards, Wuhan, China, 2020. *Emerging Infectious Diseases* **26**, 10.3201/eid2607.200885, (2020).
- 19 Tellier, R. Aerosol transmission of influenza A virus: a review of new studies. *Journal of the Royal Society Interface* **6**, S783-S790, (2009).
- 20 Zhang, D. *et al.* Potential spreading risks and disinfection challenges of medical wastewater by the presence of Severe Acute Respiratory Syndrome Coronavirus 2 (SARS-CoV-2) viral RNA in septic tanks of fangcang hospital. *medRxiv*, 2020.2004.2028.20083832, (2020).
- 21 Kim, S.-H. *et al.* Extensive Viable Middle East Respiratory Syndrome (MERS) Coronavirus Contamination in Air and Surrounding Environment in MERS Isolation Wards. *Clinical Infectious Diseases* **63**, 363-369, (2016).
- 22 Weber, D. J., Sickbert-Bennett, E. E., Kanamori, H. & Rutala, W. A. New and emerging infectious diseases (Ebola, Middle Eastern respiratory syndrome coronavirus, carbapenem-resistant Enterobacteriaceae, *Candida auris*): Focus on environmental survival and germicide susceptibility. *American Journal Of Infection Control* **47**, A29-A38, (2019).
- 23 Morter, S. *et al.* Norovirus in the hospital setting: virus introduction and spread within the hospital environment. *Journal Of Hospital Infection* **77**, 106-112, (2011).
- 24 Brady, M. T., Evans, J. & Cuartas, J. Survival and disinfection of parainfluenza viruses on environmental surfaces. *American Journal Of Infection Control* **18**, 18-23, (1990).
- 25 Hota, B. Contamination, disinfection, and cross-colonization: Are hospital surfaces reservoirs for nosocomial infection? *Clinical Infectious Diseases* **39**, 1182-1189, (2004).
- 26 Kuzakov, Y. & Mason-Jones, K. Viruses in soil: Nano-scale undead drivers of microbial life, biogeochemical turnover and ecosystem functions. *Soil Biol Biochem* **127**, 305-317, (2018).
